# Supplementary material for: Bioinspired self-healing nickel coating
Source: Royal Society of Chemistry journal article supplement (doi:10.1039/d4ra07469f), 2024-01-01
Supplement: d4ra07469f1.pdf [file d4ra07469f1.pdf]

## SUPPLEMENTARY INFORMATION

### BIOINSPIRED SELF-HEALING NICKEL COATING

Masum Bellah<sup>1</sup>, Michael Nosonovsky<sup>1\*</sup>, Benjamin Church<sup>2</sup>, Pradeep Rohatgi<sup>1,2</sup>

<sup>1</sup>*Department of Mechanical Engineering*  
**University of Wisconsin - Milwaukee**  
Milwaukee, WI 53211, USA

<sup>2</sup>*Department of Materials Science and Engineering*  
**University of Wisconsin - Milwaukee**  
Milwaukee, WI 53211, USA

#### PUF microcapsules synthesis

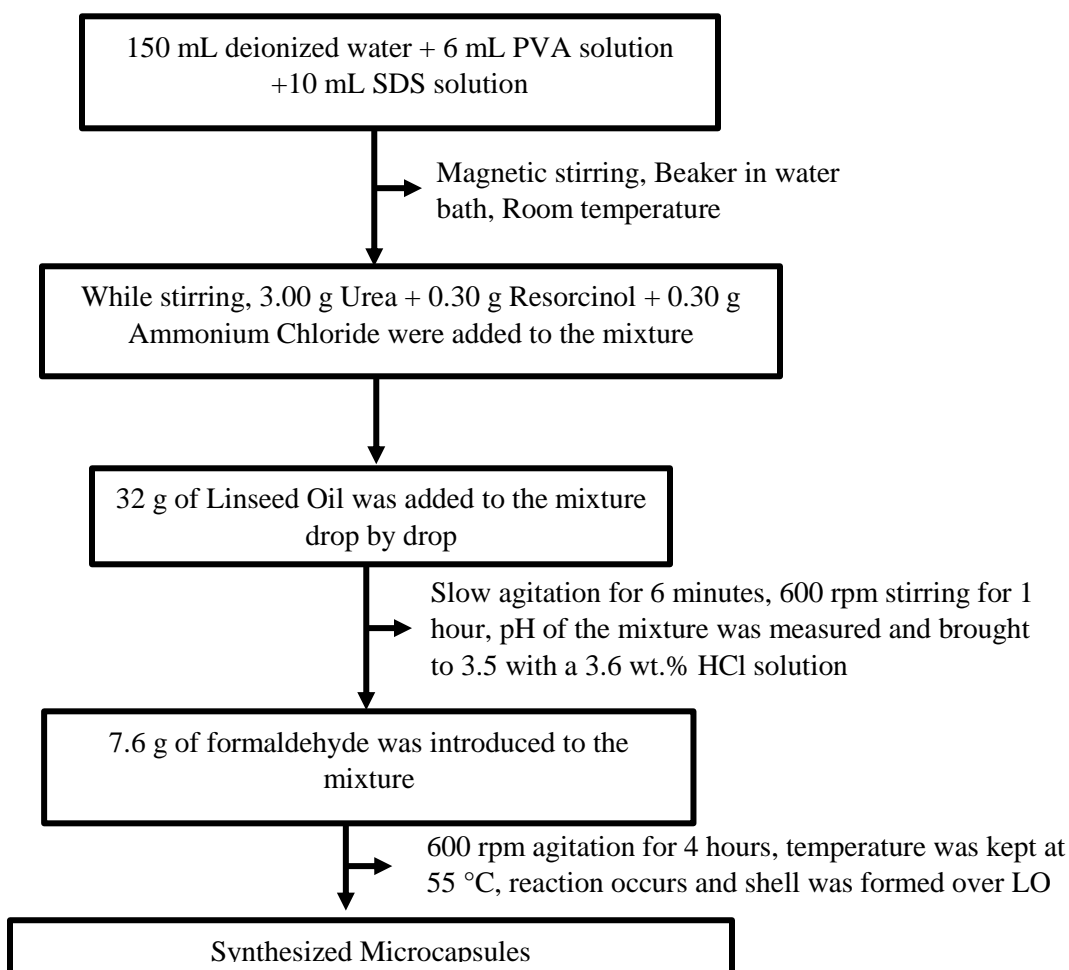

FIGURE S1: SYNTHESIS PROCEDURE OF PUF SHELL MICRO-CAPSULES CONTAINING LINSEED OIL.

\* Corresponding author: nosonovs@uwm.edu

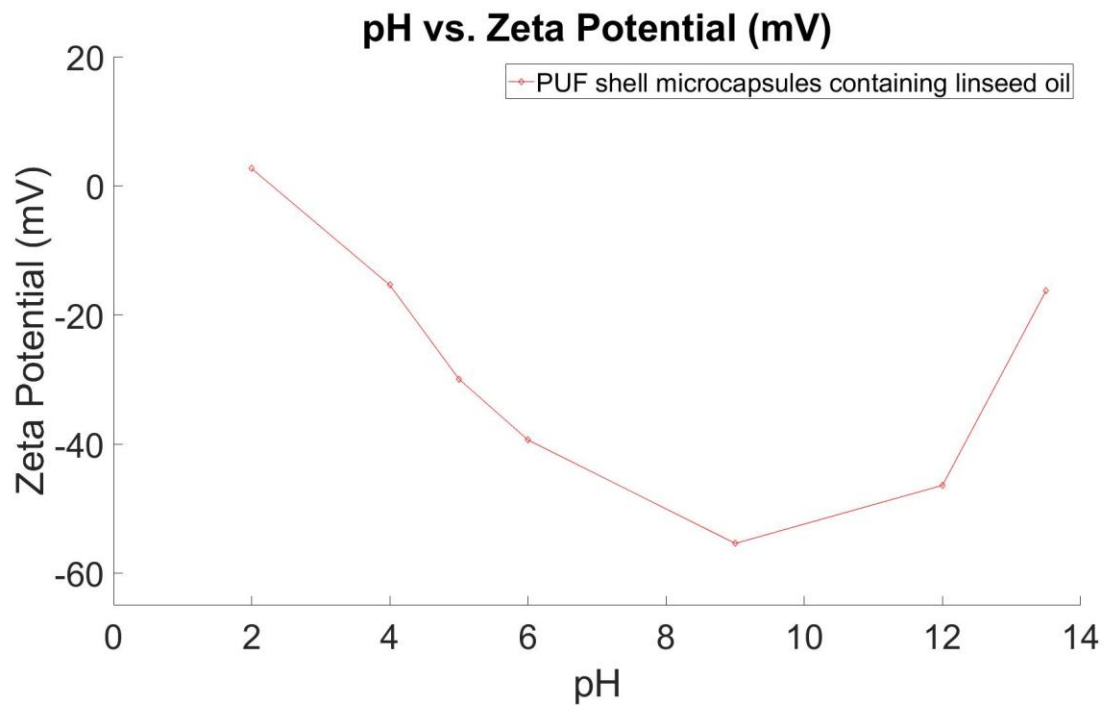

**FIGURE S2: PH VS. ZETA POTENTIAL OF PUF SHELL MICROCAPSULES CONTAINING LINSEED OIL.**

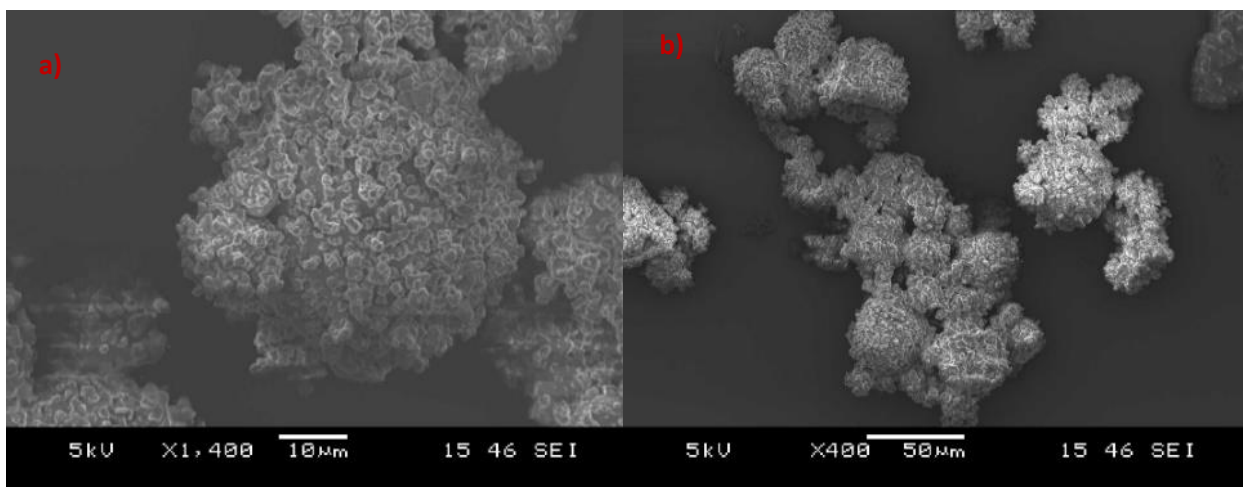

**FIGURE S3: SIZE AND MORPHOLOGY OF SYNTHESIZED MICROCAPSULES. A) MICROCAPSULES EXHIBIT A ROUGH SURFACE WITH BRANCH-LIKE SPOTS (SIZE OF THE SCALE BAR: 10  $\mu\text{m}$ ), B) MICROCAPSULES HAVE A MEAN SIZE OF  $\sim 25$  MICROMETERS (SIZE OF THE SCALE BAR: 50  $\mu\text{m}$ ).**

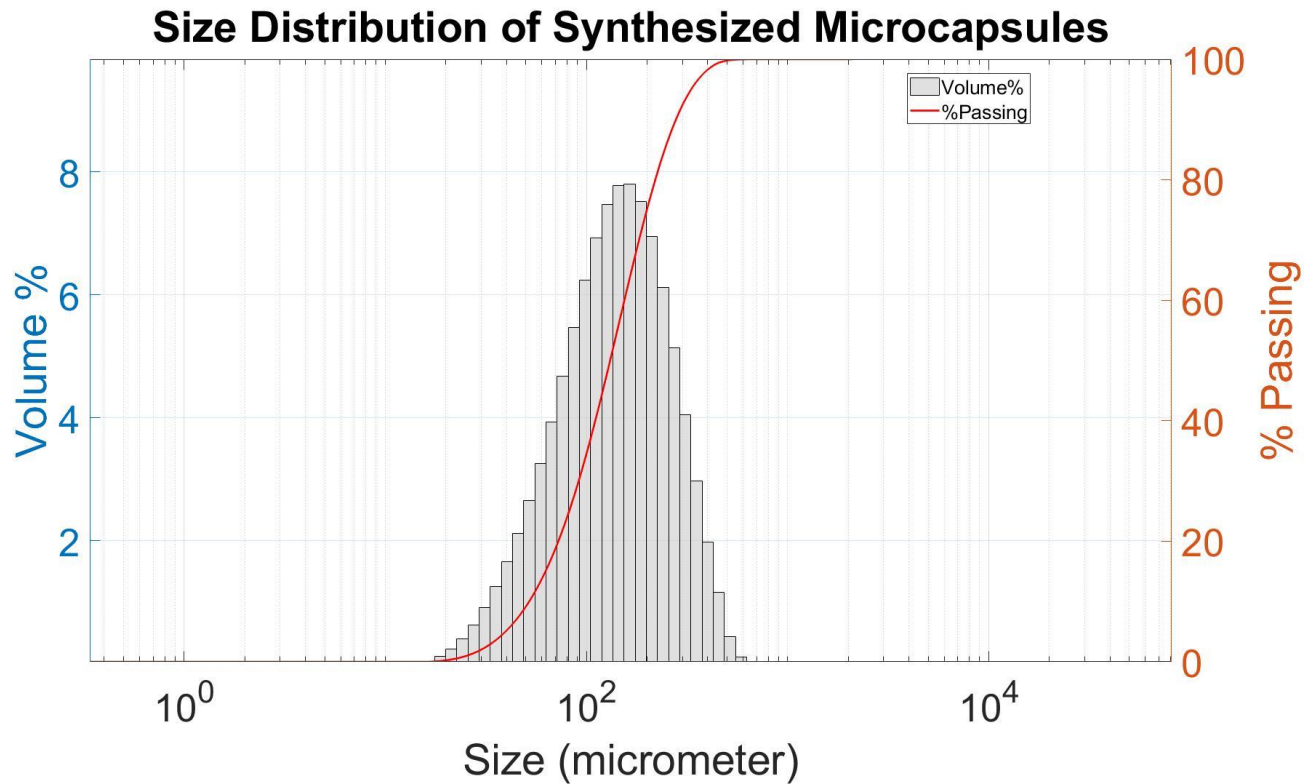

**FIGURE S4: SIZE DISTRIBUTION OF MICROCAPSULES. SIZE OF THE MICROCAPSULES WAS MEASURED USING MASTERSIZER 3000 LASER DIFFRACTION PARTICLE SIZE ANALYZER.**

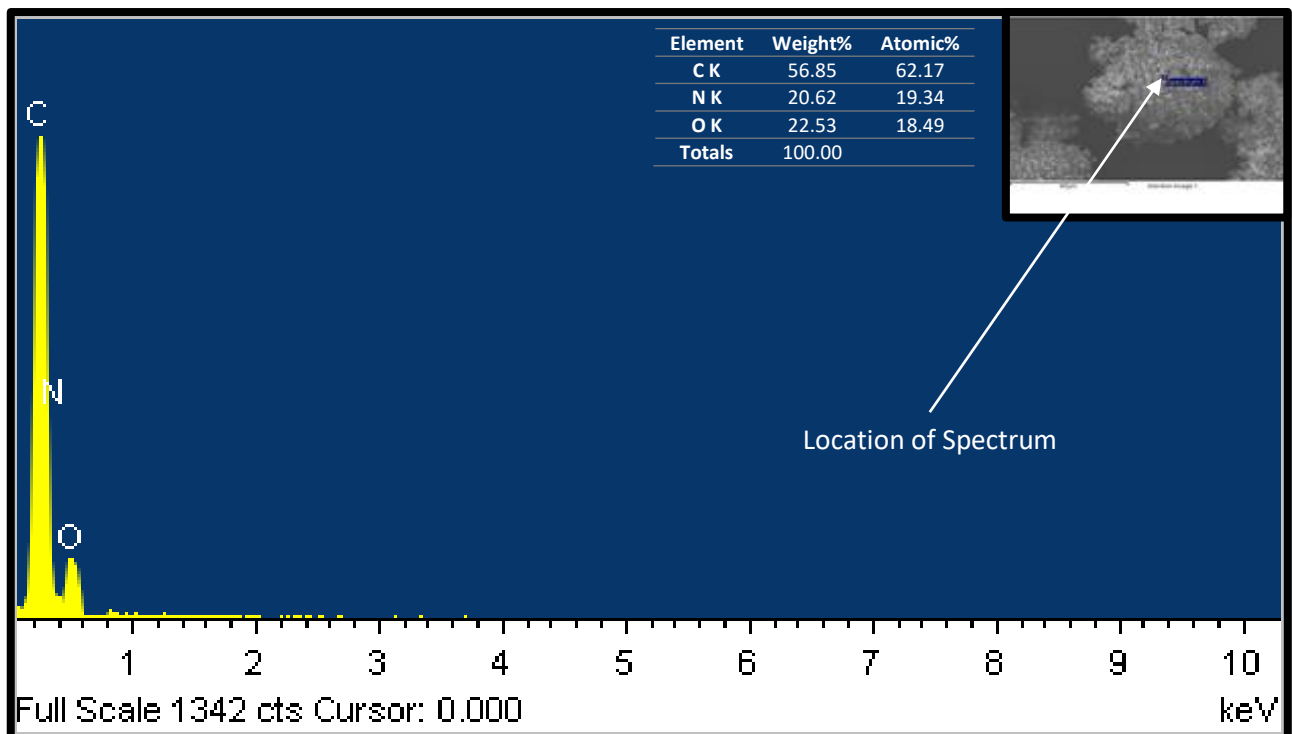

**FIGURE S5: EDS ANALYSIS OF THE SURFACE OF THE SYNTHESIZED MICROCAPSULES.**

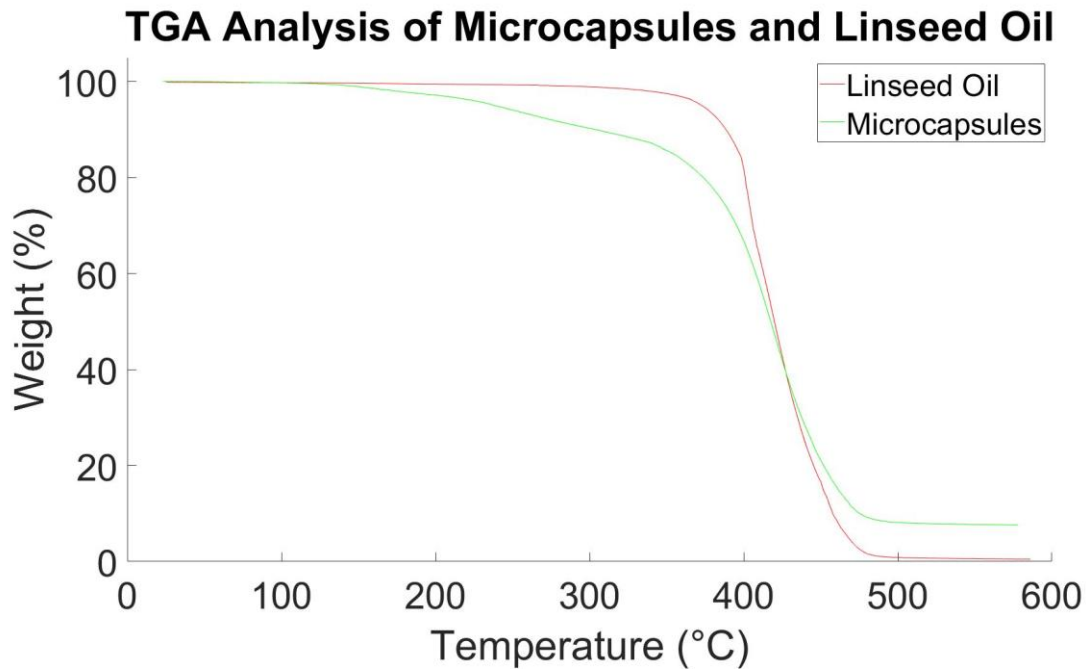

**FIGURE S6: TGA ANALYSIS OF PUF SHELL MICROCAPSULES CONTAINING LINSEED OIL AND PURE UNENCAPSULATED LINSEED OIL PERFORMED IN AN ARGON GAS ENVIRONMENT.**

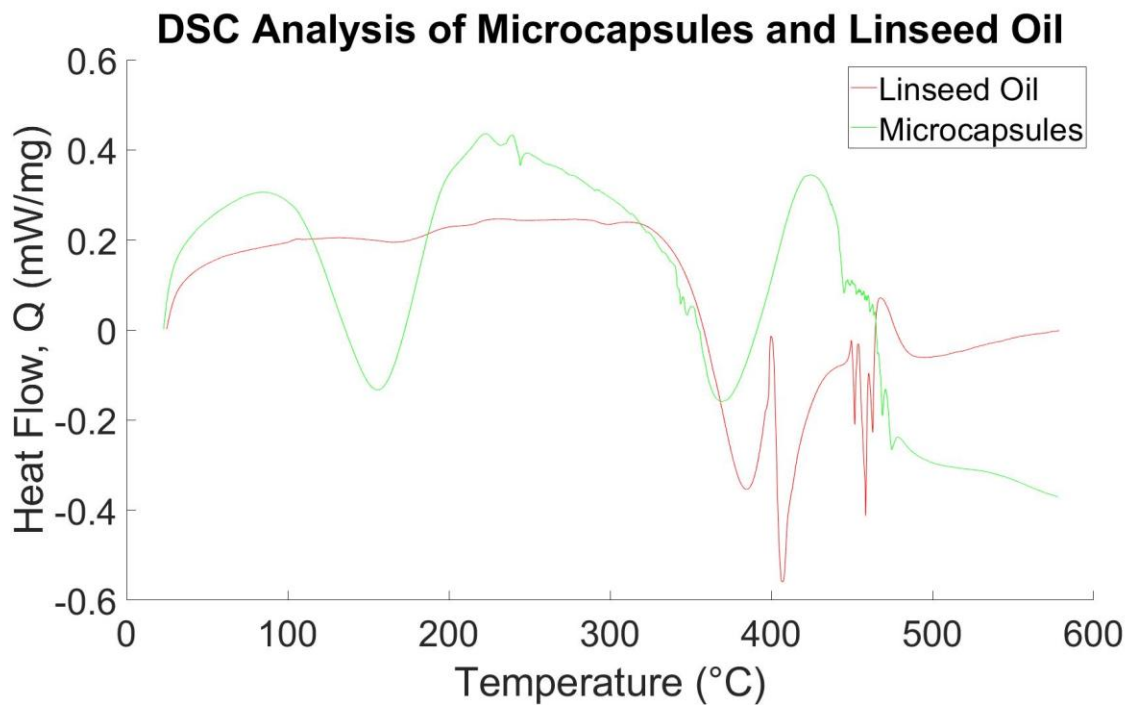

**FIGURE S7: DSC ANALYSIS OF PUF SHELL MICROCAPSULES CONTAINING LINSEED OIL AND PURE UNENCAPSULATED LINSEED OIL PERFORMED IN AN ARGON GAS ENVIRONMENT.**

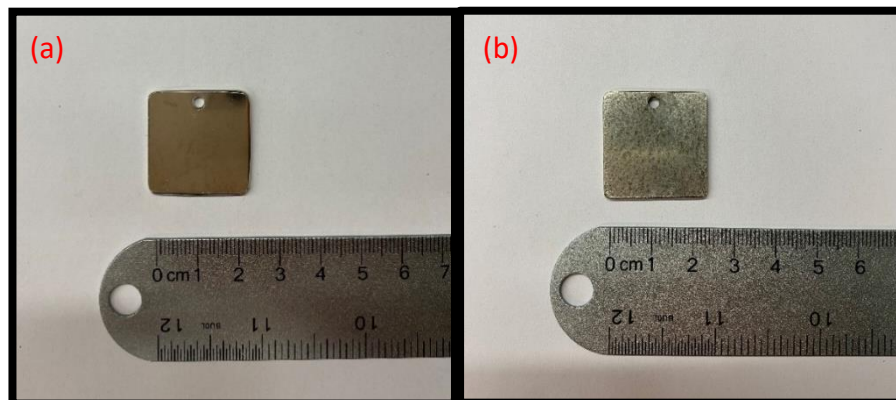

FIGURE S8: A) MILD STEEL PLATE SAMPLE COATED WITH NICKEL COATING, B) SAMPLE COATED WITH NI-PUF MICROCAPSULES SELF-HEALING COATING, THE QUANTITY OF MICROCAPSULES IS 10 G/L.

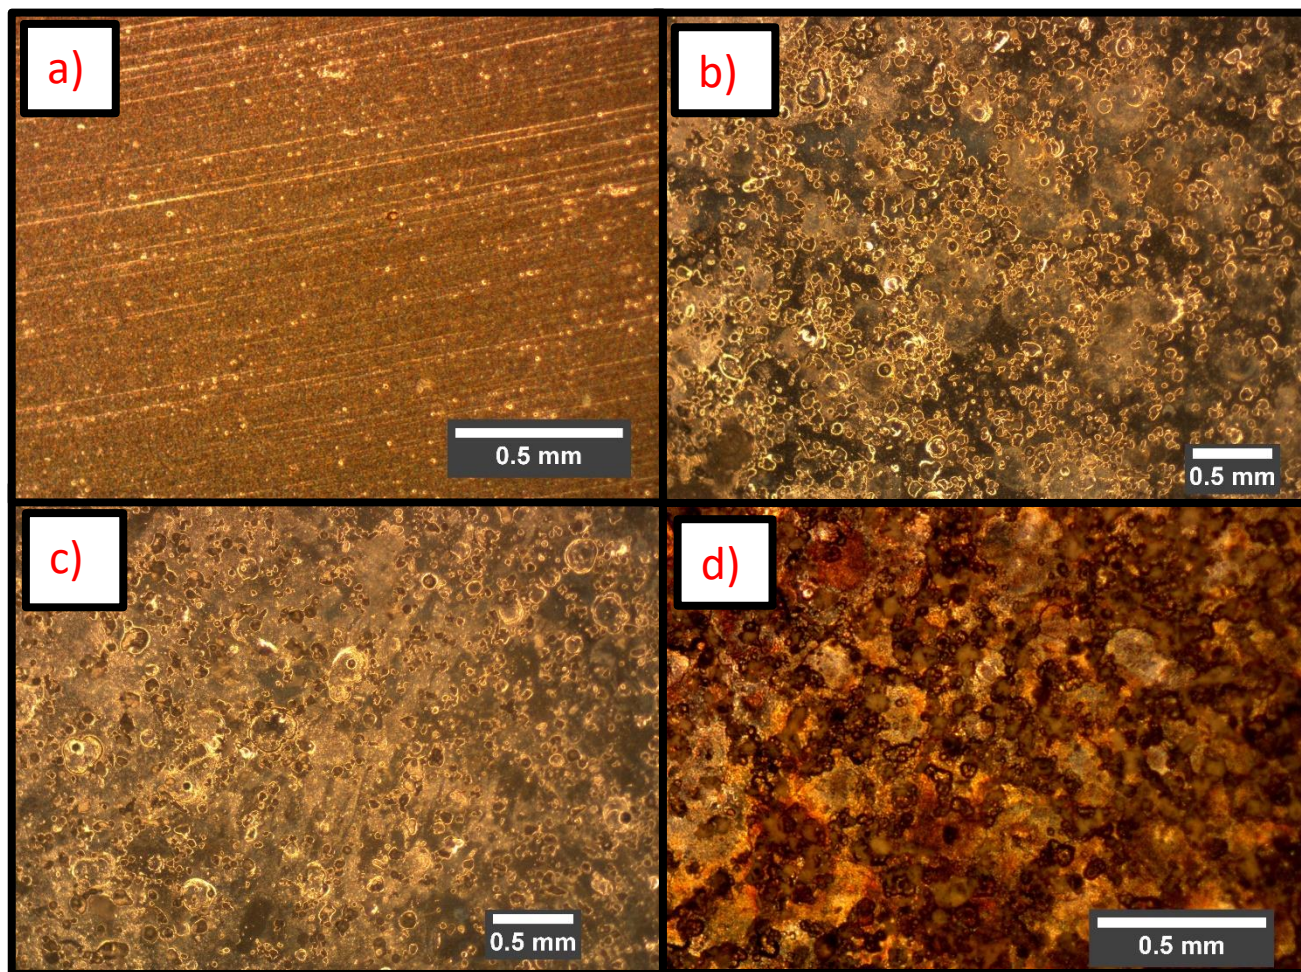

FIGURE S9: OPTICAL STEREO MICROGRAPHS OF NICKEL-PUF SHELL MICROCAPSULES SELF-HEALING COATING WITH VARYING MICROCAPSULE CONCENTRATIONS: (A) 0 G/L, (B) 10 G/L, (C) 20 G/L, AND (D) 30 G/L IN THE BATH.

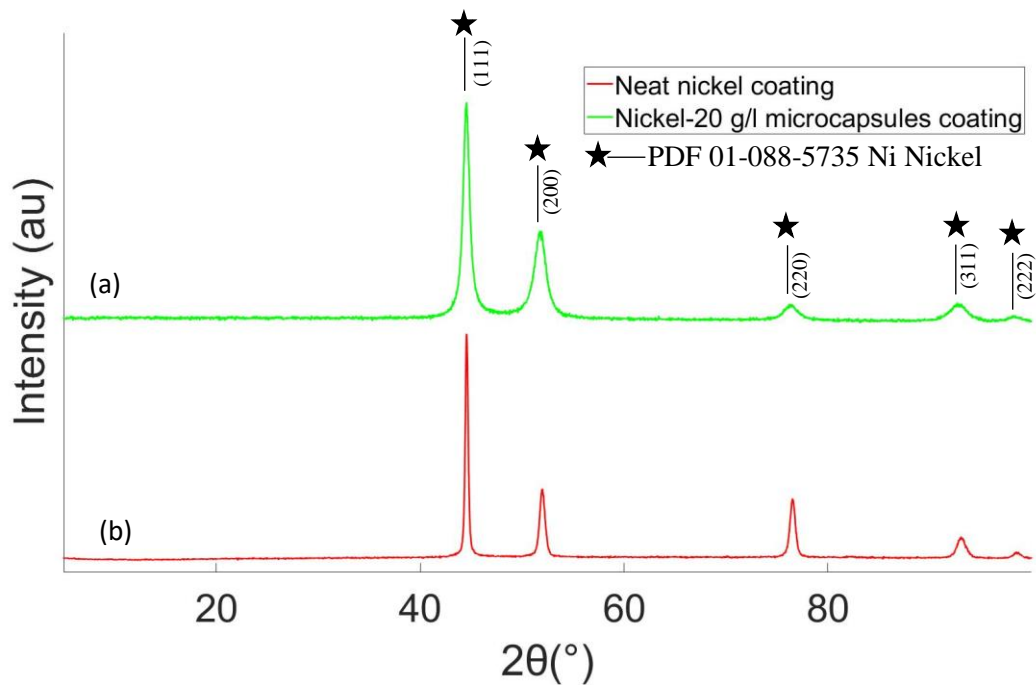

FIGURE S10: X-RAY DIFFRACTION PATTERNS FOR (A) NEAT NICKEL COATING, (B) NICKEL-20G/L MICROCAPSULES COATING.

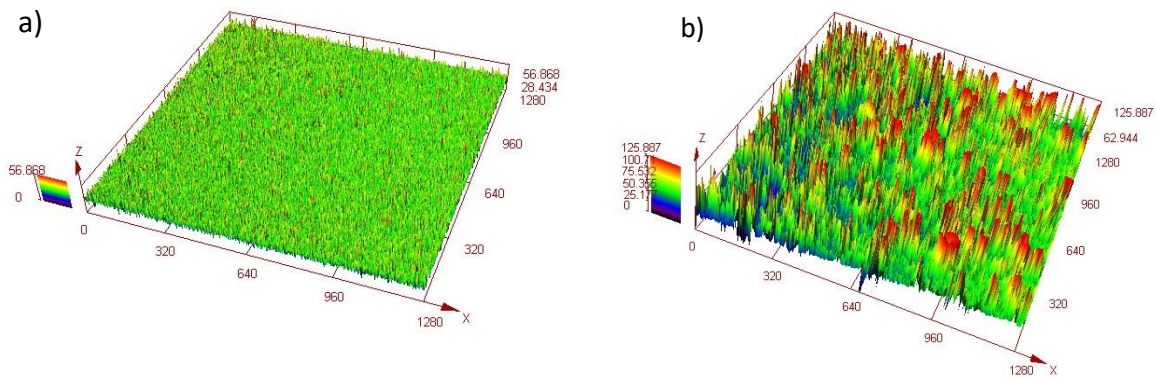

FIGURE S11: CONFOCAL LASER SCANNING MICROSCOPY SURFACE ROUGHNESS MEASUREMENTS FOR (A) NEAT NICKEL COATING, (B) NICKEL-20G/L MICROCAPSULES COATING, SHOWING THE 3D SURFACE.

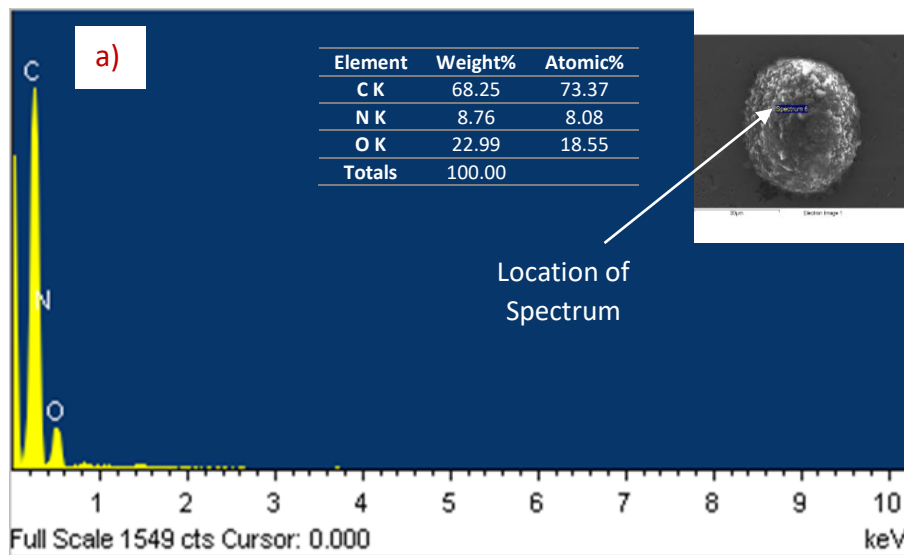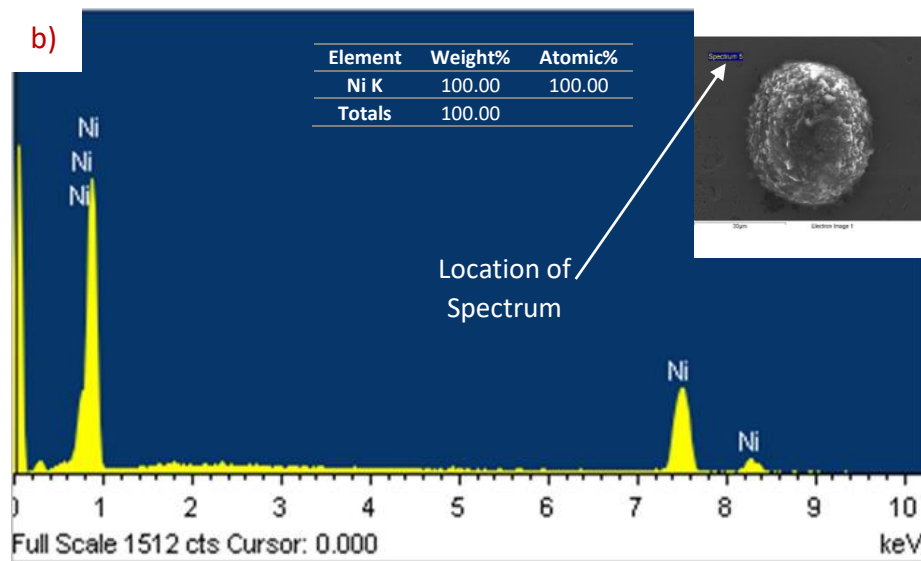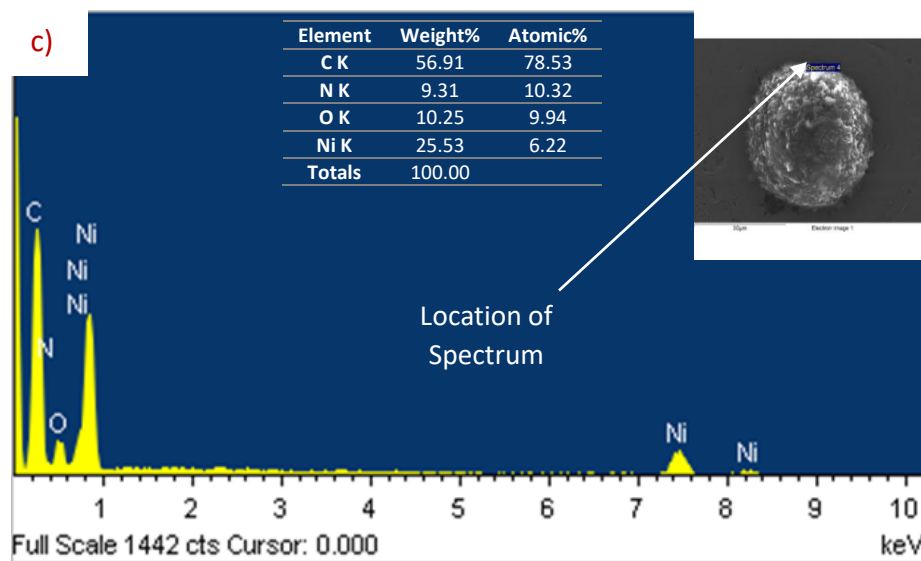

**FIGURE S12: EDS ANALYSIS OF NI-PUF MICROCAPSULES SELF-HEALING COATING, SPECTRA FOR A) EXPOSED MICROCAPSULES, B) AREA SURROUNDED NICKEL COATING, C) MICROCAPSULES-NICKEL INTERFACE.**

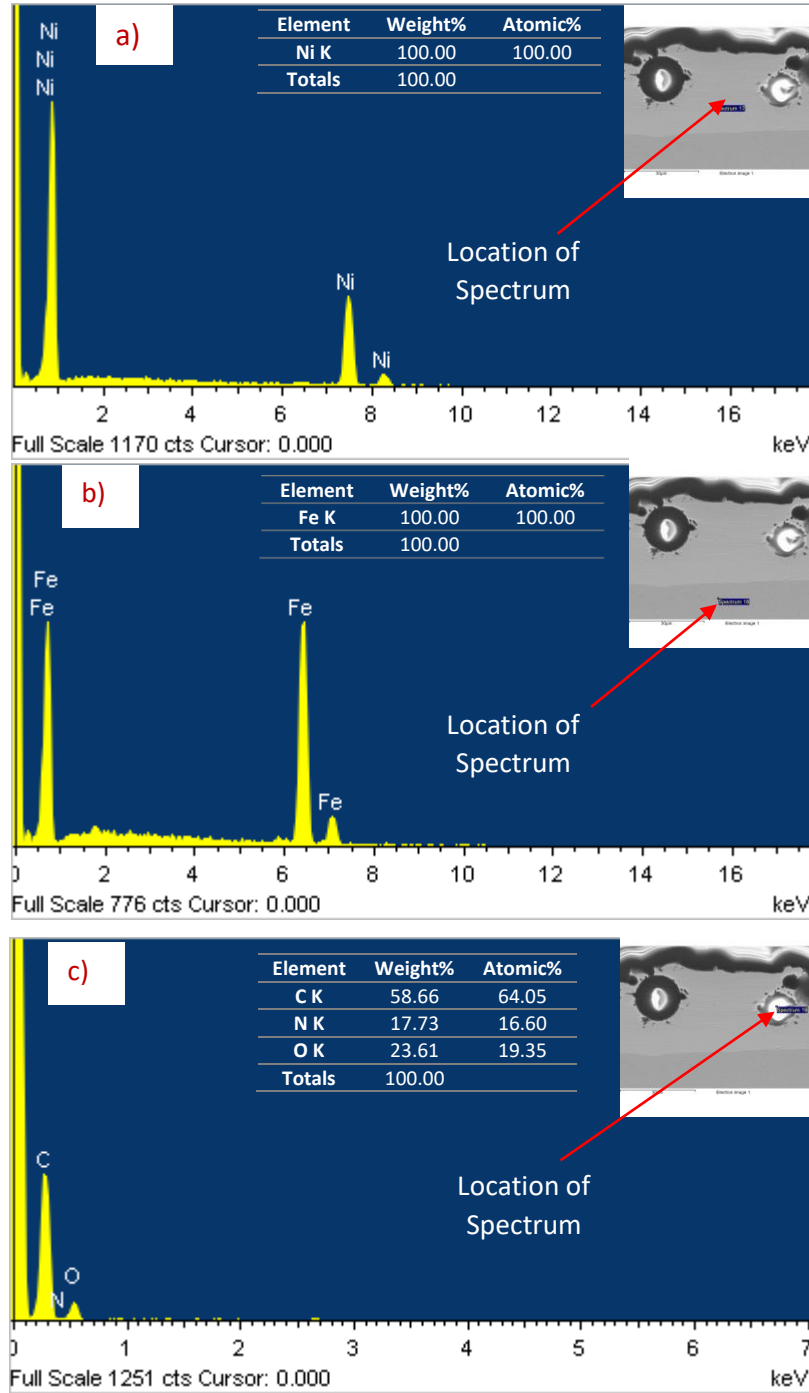

**FIGURE S13: EDS ANALYSIS OF THE CROSS-SECTIONAL AREA OF Ni-PUF MICROCAPSULES SELF-HEALING COATING; SPECTRA FOR A) NICKEL DEPOSIT, B) MILD STEEL SUBSTRATE, C) SURFACE OF MICROCAPSULE.**



**TABLE S1: THE IMAGES FROM THE IMMERSION TEST ACCORDING TO ASTM G31 IN 3.5% NaCl SOLUTION TO ASSESS THE CORROSION PROTECTION OF SELF-HEALING COATINGS**

| Amount of Microcapsules |          | 0 g/l                                                                               | 10 g/l                                                                              | 20g/l                                                                                | 30 g/l                                                                                |
|-------------------------|----------|-------------------------------------------------------------------------------------|-------------------------------------------------------------------------------------|--------------------------------------------------------------------------------------|---------------------------------------------------------------------------------------|
| Elapsed Time            | 0 hours  |    |    |    |    |
|                         | 6 hours  |   |   |   |   |
|                         | 24 hours |  |  |  |  |
